# Supplementary material for: A GDSL lipase-like from Ipomoea batatas catalyzes efficient production of 3,5-diCQA when expressed in Pichia pastoris
Source: PubMed Central journal article supplement (PMC7666189; doi:10.1038/s42003-020-01387-1), 2020-11-13
Supplement: 42003_2020_1387_MOESM1_ESM.pdf [file 42003_2020_1387_MOESM1_ESM.pdf]

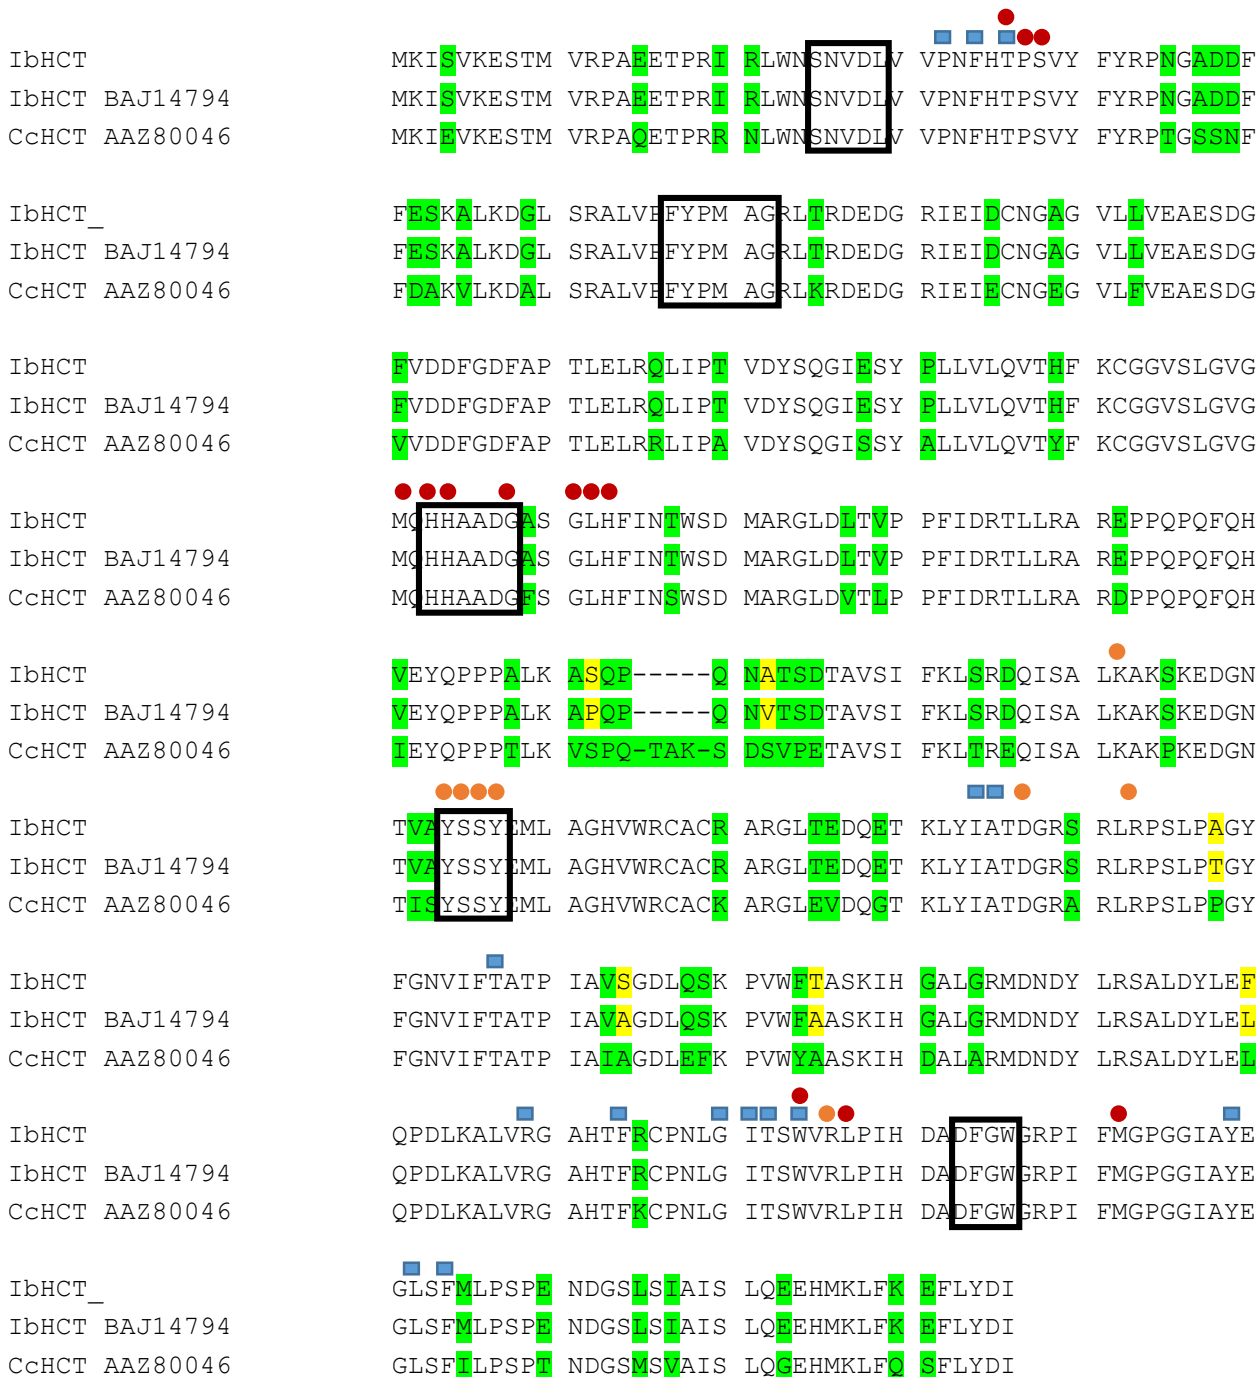

**Supplementary Figure 1:** Alignment of the amino acid sequence of IbHCT with that of a previously identified HCT from *I. batatas* (AB047805) and that of an HCT from *Cyanara cardunculus* (AAZ80046).

The amino acids (AAs) highlighted in green are different between sequences from *I. batatas* and *C. cardunculus*. The AAs highlighted in yellow are different between the IbHCT cloned in this work and the sequences available in the databank. Conserved motifs are in black boxes. AAs predicted to interact with both substrates are highlighted by a blue scar. AAs predicted to interact with hydroxycinnamic acid derivatives are highlighted by a red dot. AAs predicted to interact with CoA are highlighted by an orange dot.

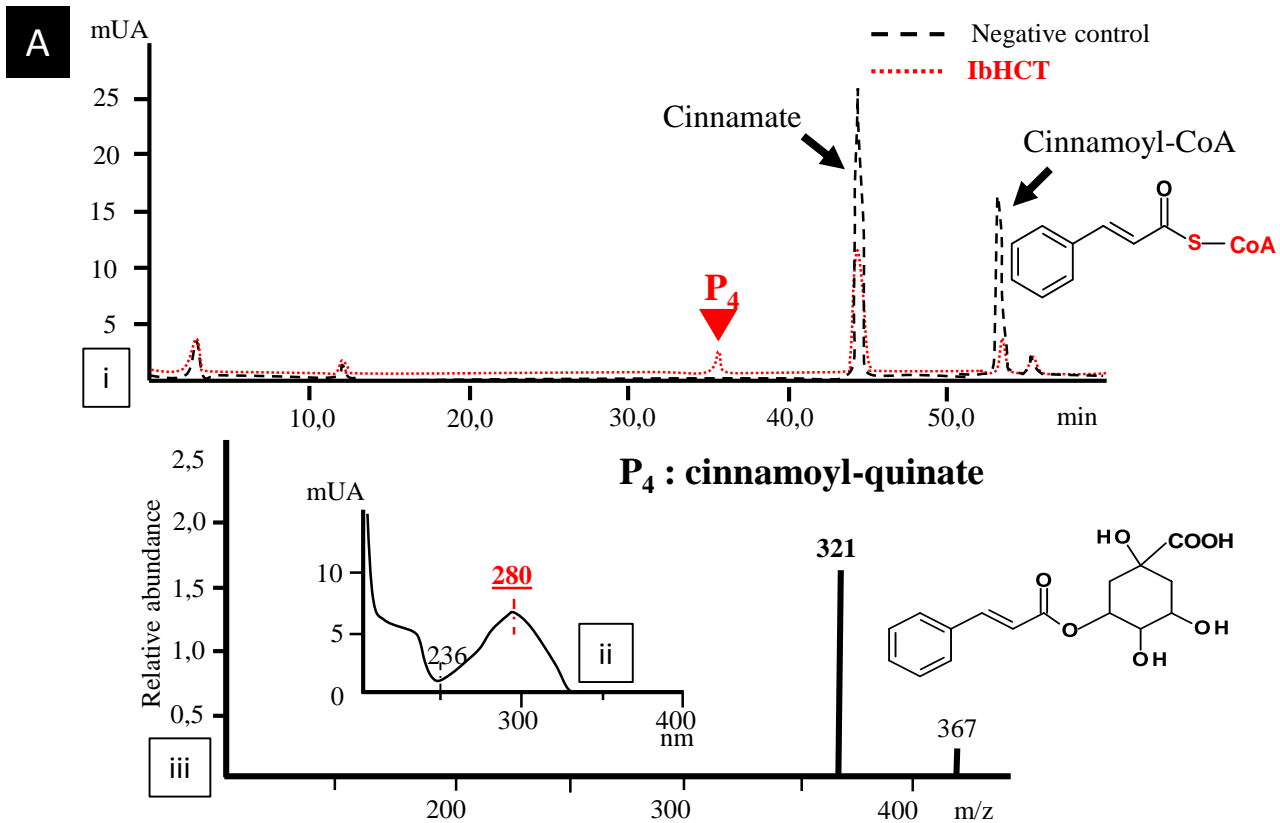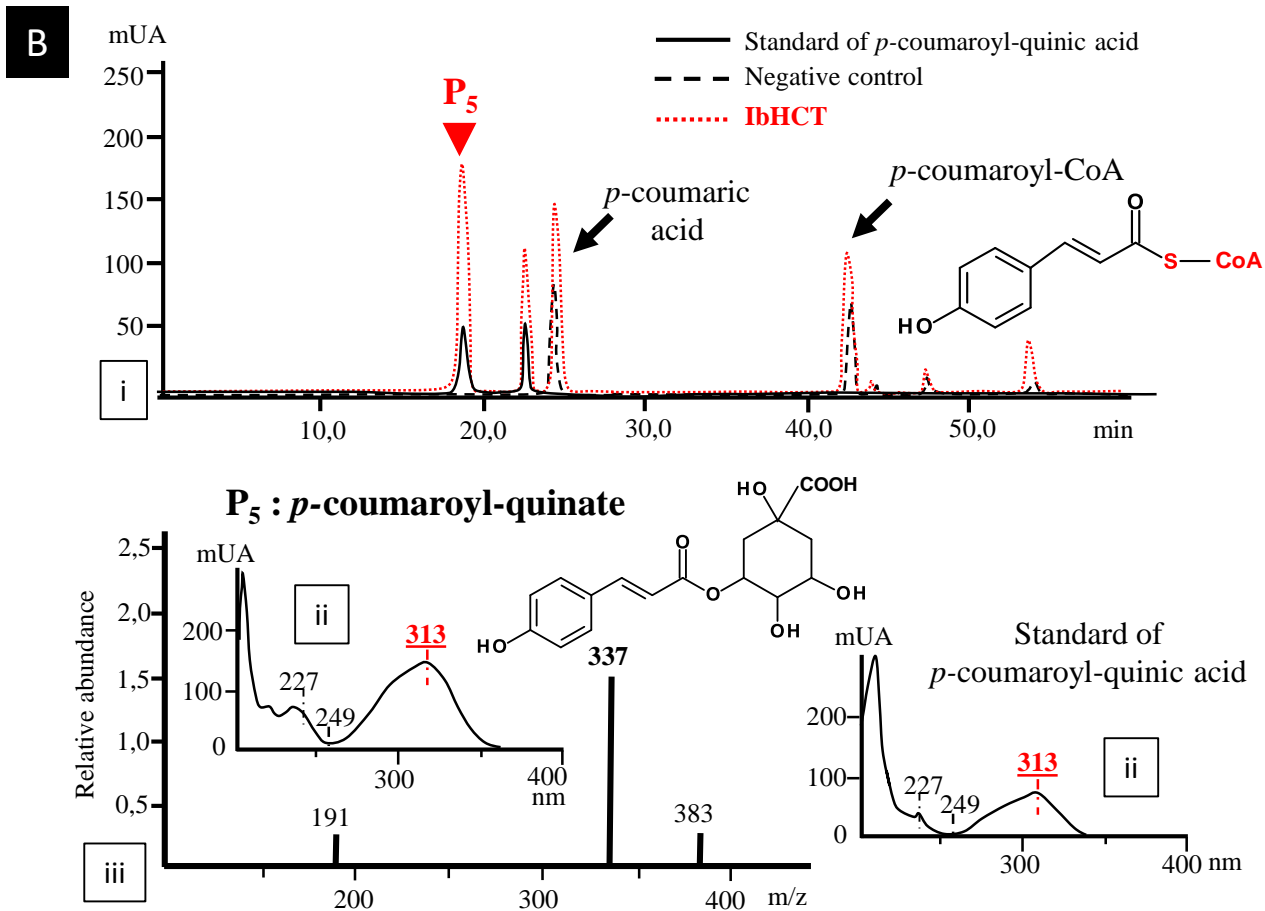

**Supplementary Figure 2:** Synthesis of cinnamoyl-quinic acid (A) and *p*-coumaroyl-quinic acid (B) by incubation of cinnamoyl- and *p*-coumaroyl-CoA, respectively, with quinic acid in the presence of IbHCT for 1 h at 30°C in pH 7-established conditions i) HPLC profile of the enzymatic reaction (330 nm), ii) UV spectrum and iii) MS analysis.

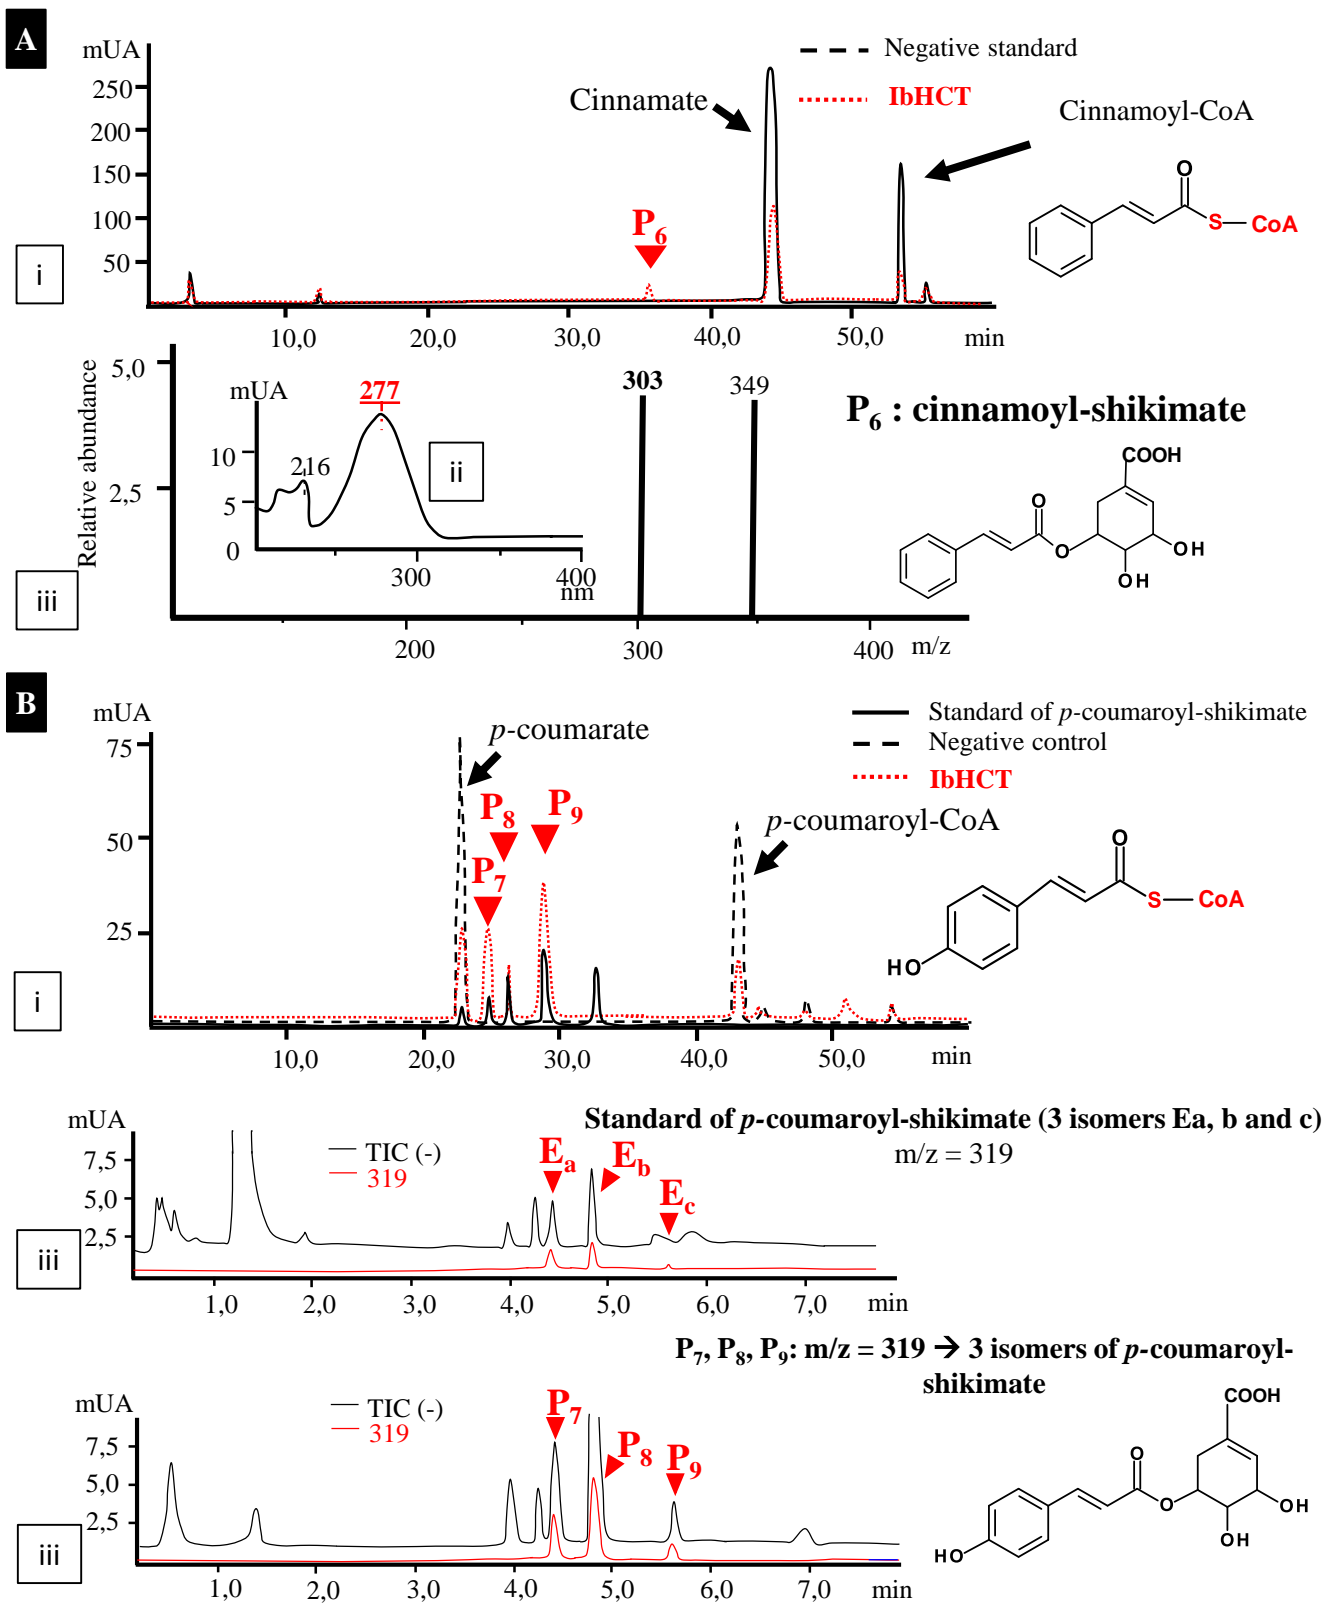

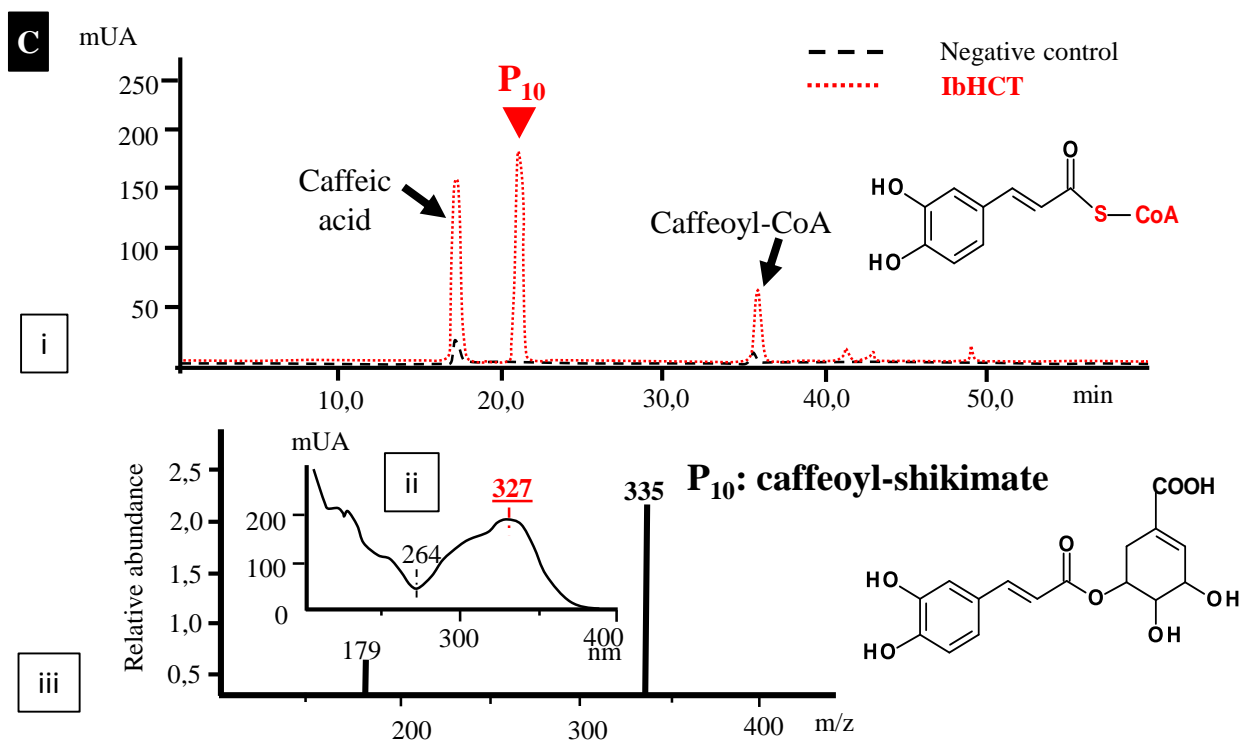

**Supplementary Figure 3:** Synthesis of cinnamoyl-shikimate (A), *p*-coumaroyl-shikimate (B) and caffeoyl-shikimate (C) by incubation of cinnamoyl-, *p*-coumaroyl- and caffeoyl-CoA, respectively, with shikimic acid in the presence of IbHCT for 1 h at 30°C at 30°C in pH 7-established conditions. i) HPLC analysis (330 nm) ii) UV spectrum and iii) MS analysis.

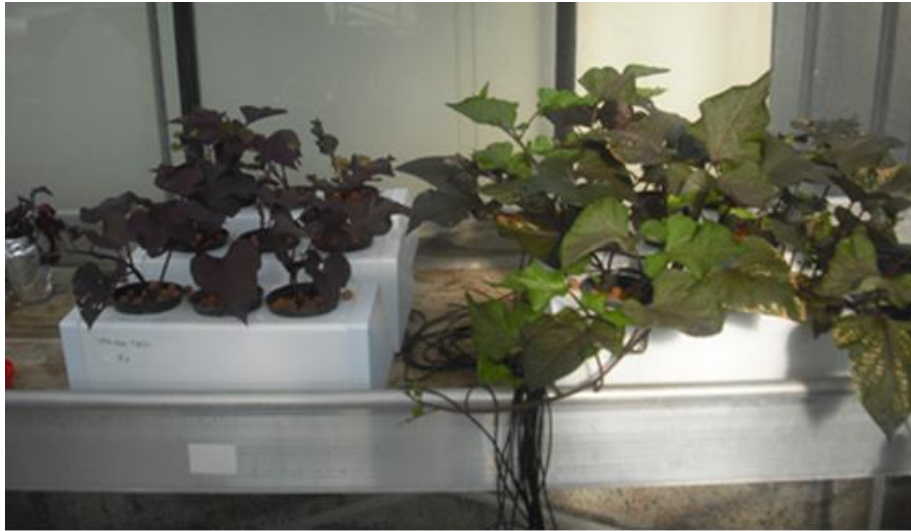

**Supplementary Figure 4:** Sweet potato cultured in hydroponic conditions. Left in nitrogen-free medium, right in the presence of NPK (15/10/30).

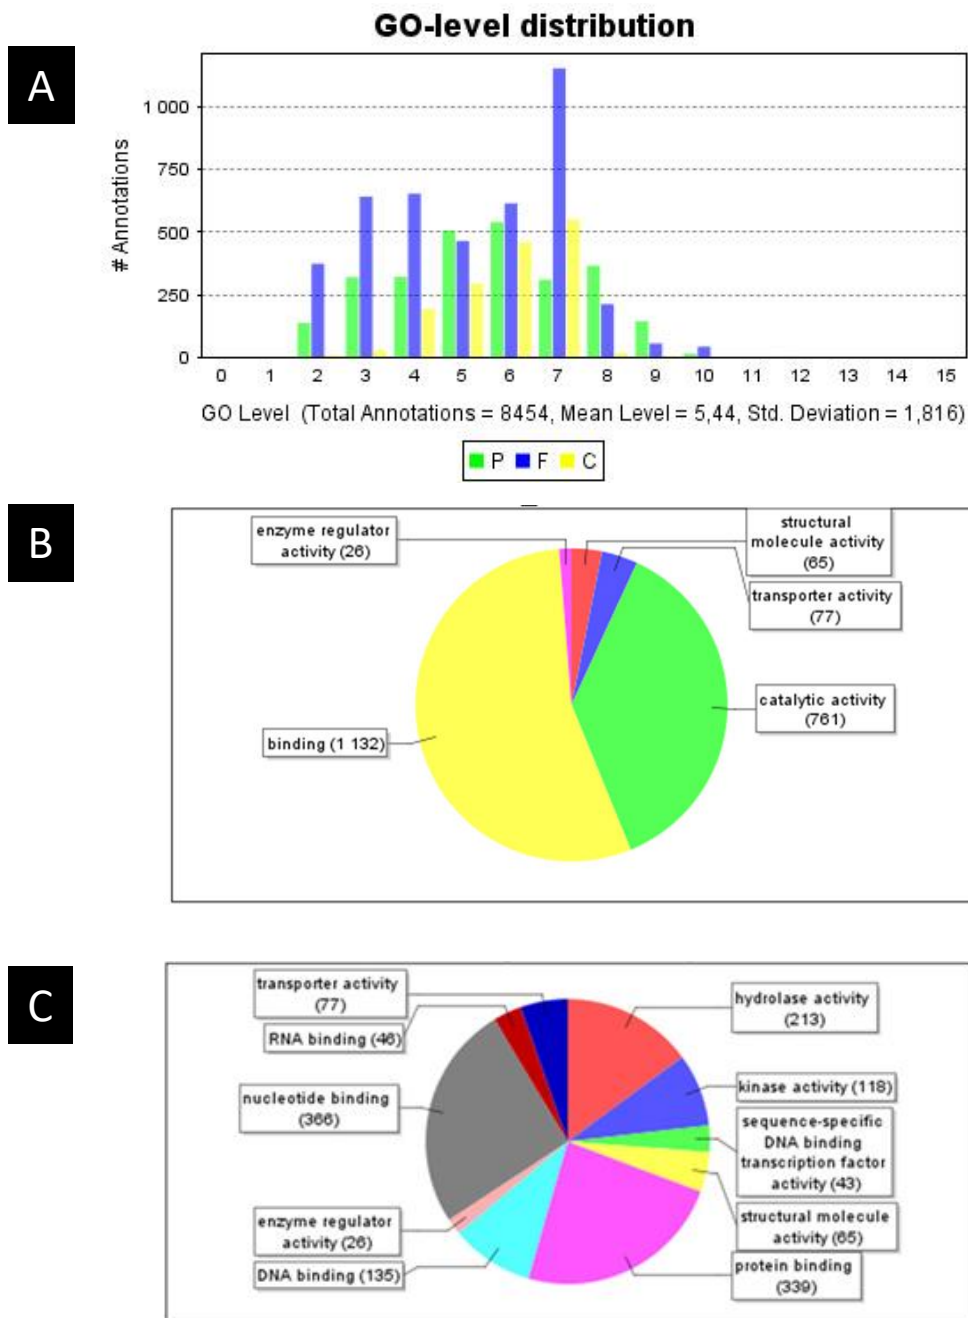

**Supplementary Figure 5:** Analysis of the *I. batatas* RNA-seq Library.

A) Each sequence is associated with 4 up to 7 annotations GO (P=biological process, F= molecular function, C= cellular compounds) B) Detailed analysis of the molecular functions associated with the contigs. C) Analysis of the predicted catalytic functions.

**Supplementary Figure 6:** Phylogenetic tree of amino acid sequences of acyltransferases of the BAHD family (adapted from D'Auria et al. <sup>58</sup>). The phylogenetic reconstruction was generated by the neighbour-joining method and displayed using the MEGAX program with bootstrap values of 1000 replicates. Bootstrap values (%) are shown at nodes. HCT is highlighted in orange, and HQT is highlighted in green. Sequences used for alignments: *AsHHT1*: BAC78633; *AT1*: AET80688; *AtCER2*: AAM64817; *AtHCT*: NP\_199704.1; *CbBEAT*: AAN48360; *CbHCT2*: CBI83579; *CbRAS*: AOPDV5; *CcHCT*: ABO47805; *CcHQT*: ABO77957; *CyHQT*: ABK79689; *CsHCT*: NP\_001295843.1; *CsHQT*: ACF3707957; *DcHCBT2*: O23917; *Dv3MAT*: AAO12206; *EchQT*: AFF19203; *EcoATA*: NP\_312354.1; *Gt5AT*: BAA74428; *HvACT*: AAO73071; *IbHCT*: BAJ14794; *IbHCBT*: BAA87043; *IbHQT*: BAJ14795; *LaAAT1*: ABI48360; *LjHQT*: ACZ52698; *MtHCT*: XP\_013454529; *NtHCBT*: AAN09798; *NtHCT*: CAD47830; *OsHCT4*: NP\_001057003; *PgHCT*: AEM63675; *PvHCT1*: AFY17066; *RsVs*: CAD89104; *SbHCT*: EES05411; *NtHQT*: CAE46932; *SIHQT*: NP\_001234850; *SpAAT1*: NP\_001310384; *StHQT*: ABA46756; *TpHCT1*: ACI16630.

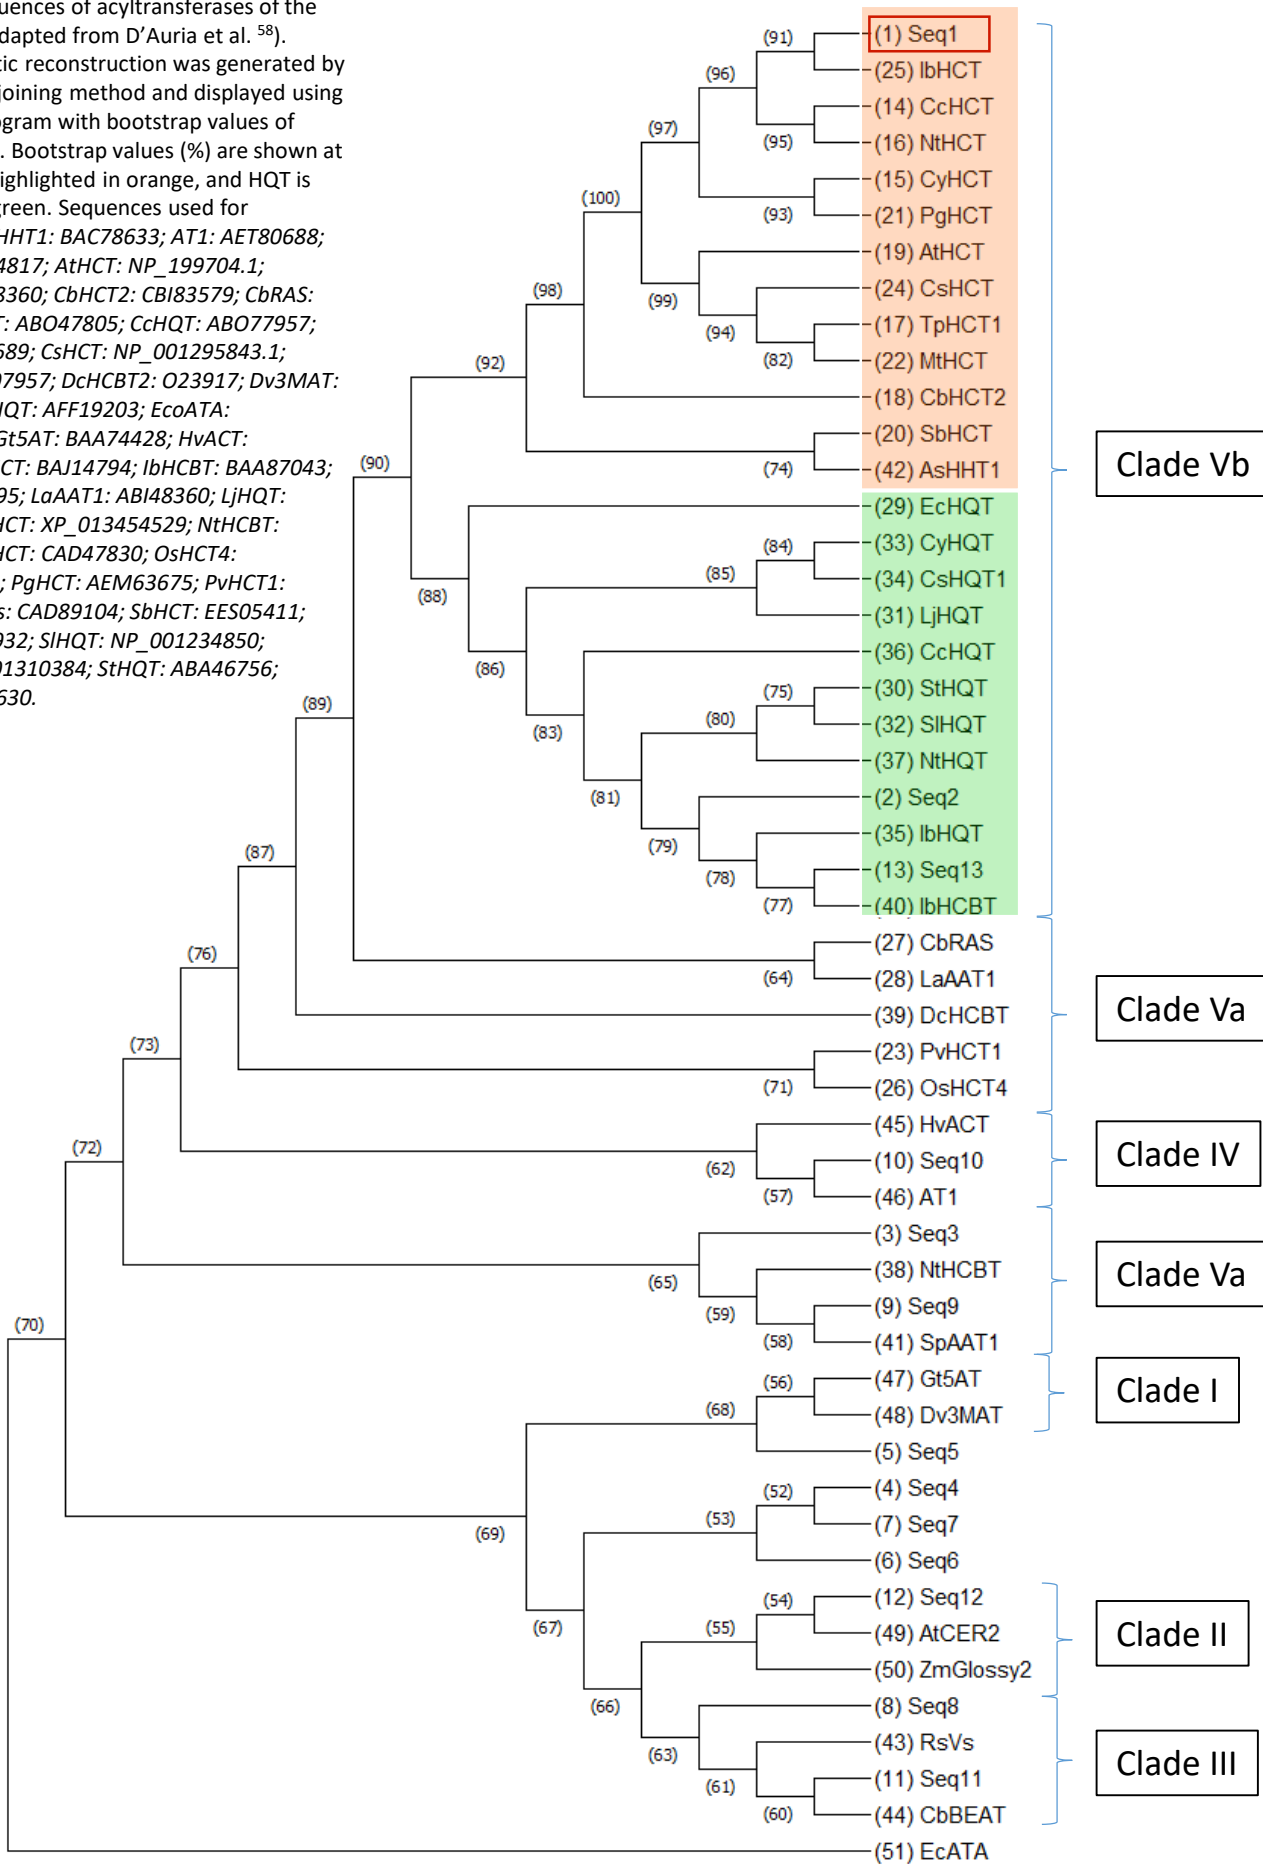

### A) Coding Sequence

```
ATGGCCGCCGCAGCTCCTTCTTCCTCGTTGCTTGGTGTCTGATGCTGTTAGCTTCCATTGGCTACGCCGCCGCT
TGCTATTCGGCCGTTTTTCGGCTTCGGCGATTCCCTCACGGATGCCGGAAACCTAATCCGCCTTGAGCCTGACGGC
ACCGTCCCCCACATGTACTTCCCGCCCTACGGCGAAACCTACTTCGACAAGCCCACCGGACGCTGCTCCGACGGC
CGCCTCATCGTCGATTTAATCGCTCAGCATTACGGGCTTCCGCTTCCGCCGCCTTCGATCCCGGCCAGTTTGGAA
GGCGACAAAAACCGCCTCCGTGCCGGAGTCAACTTCGCGGTGGTCGGATCACGTGCGCTCGACGCGCAATTCTAC
GAACAGAGAGACATTTTCGACACTGTCACCAACGTTTTCCATGACAGATCAGTTGAATTGGTTCAAGGAATTGCTC
CCATCTCTGTGCTCATCACCTCACGATTGCAAGGAGCTATTGGATGGGTCATTGTTTTGTACTAGGAGAATTTGGA
GGCAACGATTACACGCACTCGCTTCTATCCGGAAAAGGTATCAATGTCATCCGACCGTTCATTCCAATCGTCACC
CGCGCAATTGCTCAGGCTGTCCATGAATTAGTTGAGCTAGGTGCGAGGACAGTAATGATCCCCAGCGTGTACCA
CTTGGATGTGCAGCCTCGTACTTGACATACTACCCAAGTCCCAACCCAGATGACTACGATGAACTAGGTTGTCTC
ATTTGGGTTAACGAAATGGCTTCTTACCACAACCAACTCCTCCAGCAACAACCTCGCCCACGTAAGAGAACTTCAT
CCCTATGCCAATATCGTCTTCGCCGATATTTACAATGCCGCCATGGAGGTTTACCAGGGTCCCGATACTTATGGG
TTTTCCGGGGGAGCTTTGAGAGCATGTTGTGGCGGGGAGGTCCGTACAACCTCAACACCTCCGCACAATGCGGT
AACGAGGGGAGCAACCGCCTGTGACAACCCCTTCTCGTACGTTAACTGGGACGGTTATCACTTAACGGAGGCTGCC
TATCAATGTATTACCACCGTTTTGTTAGAGGGTCCGTATACCTATCCTCGTATGAAAAATTTGTGTGCTTTGAC
TCTCGCAAAACATCTCGAGTTGCCCAAATTTAA
```

### B) Predicted protein

```
MAAAPSSSLGLVLMLLASIGYAAACYSAVFGFGDSLTDAGNLIRLEPDGTVPHMYFPPYGETYFDKPTGRCS DG
RLIVDLIAQHYGLPLPPPSIPASLEGDKNRLRAGVNFVVGSRALDAQFYEQRFIDFTVTNVSMTDQLNWFKELL
PSLCSSPHDCKELLDGSLFVLGEFFGGNDYTHSLLSGKGINVIRPFIPIVTRIAIAQAVHELVELGARTVMI PSVLP
LGCAASYLTYYPSPNPDDYDELGCLIWVNEMASYHNQLLQQQLAHVRELHPYANIVFADIYNAAMEVYQGPDTYG
FSGGALRACCGGGPYNFNTSAQCGNEGATAACDNPSSYVNWDGYHLTEAAYQCITTTGLLEGPYTYPRMKNLCRFD
SRKTSRVAQI*
```

**Supplementary Figure 7:** Nucleotide and predicted protein sequences of *IbICS* deduced from the *I. batatas* RNA-seq library. A) Coding sequence deduced from the RNA-seq library, B) Deduced amino acid sequence.



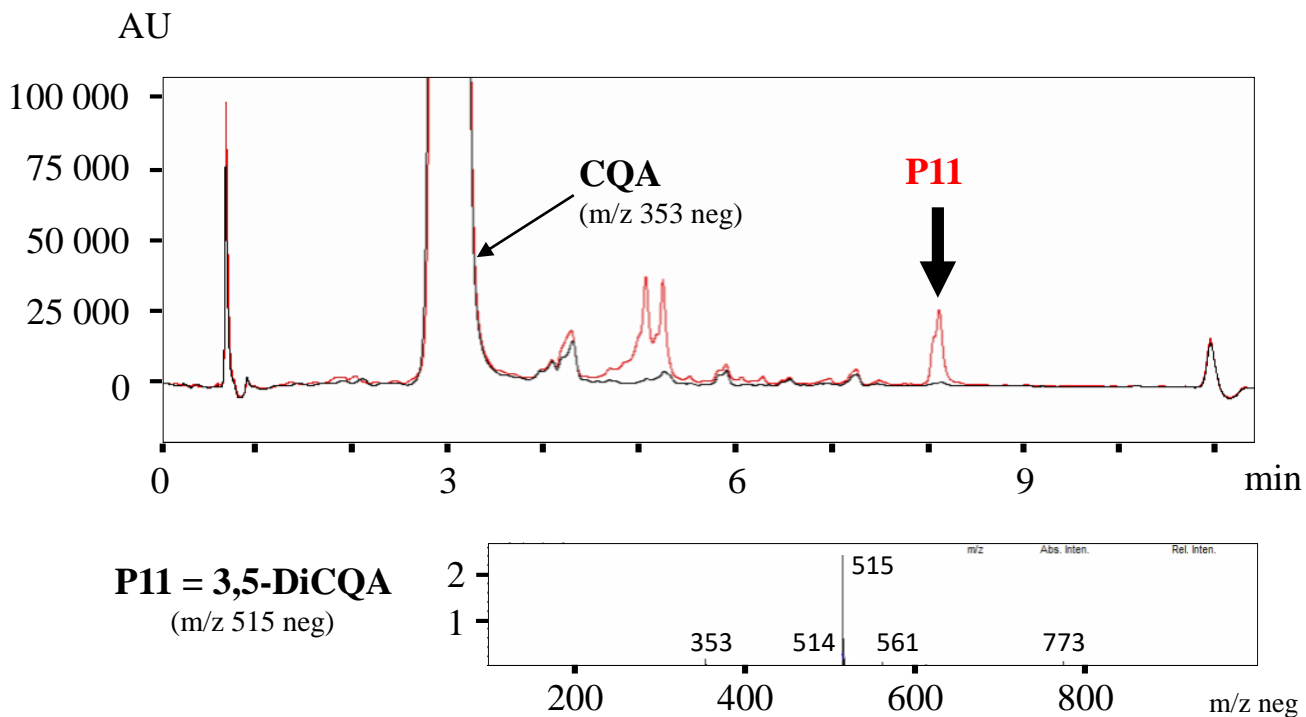

**Supplementary Figure 8:** Incubation performed with crude protein extract from *N. benthamiana* leaves agroinfiltrated by empty vector (black) or vector harbouring the *IbICS* gene. Incubations were performed in sodium phosphate buffer with a pH set at 6.5 in the presence of 50 mM 5-CQA for 22 h at 28°C. Analysis was performed at 330 nm. 5-CQA and 3,5-DiCQA were identified by MS in comparison to commercial standards.

**A**

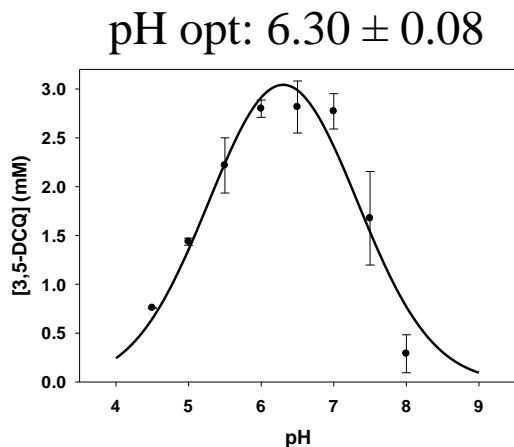

**B**

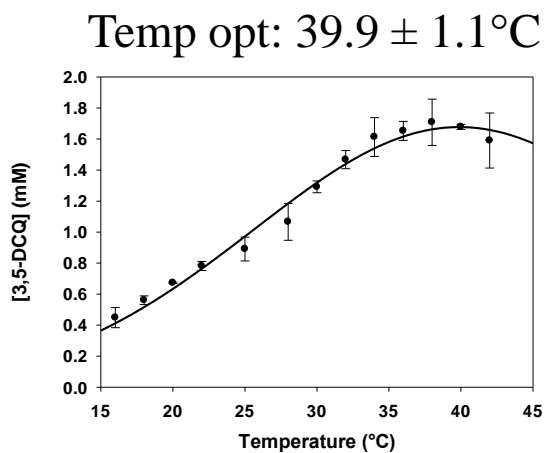

**C**

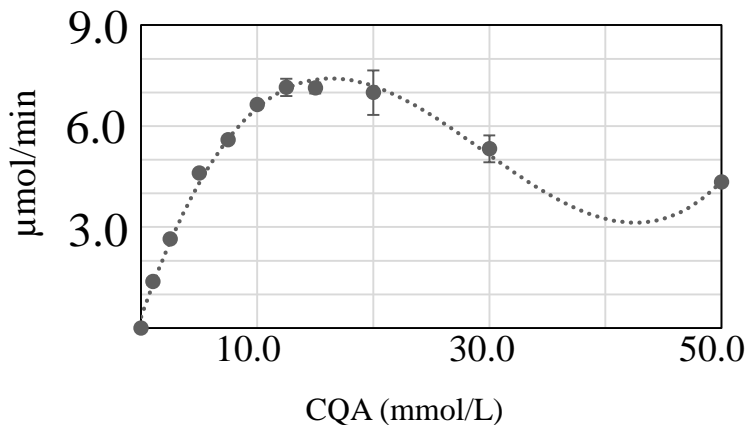

**Supplementary Figure 9:** Biochemical characterization of IbICS.

The IbICS-HIS enzyme was produced in *N. benthamiana* leaves and subsequently purified. A) Optimal pH, B) Optimal temperature, C) Kinetic parameters. To determine  $K_m$  and  $V_m$ , incubations were performed at  $36^\circ\text{C}$  for 30 min at pH 6.5.

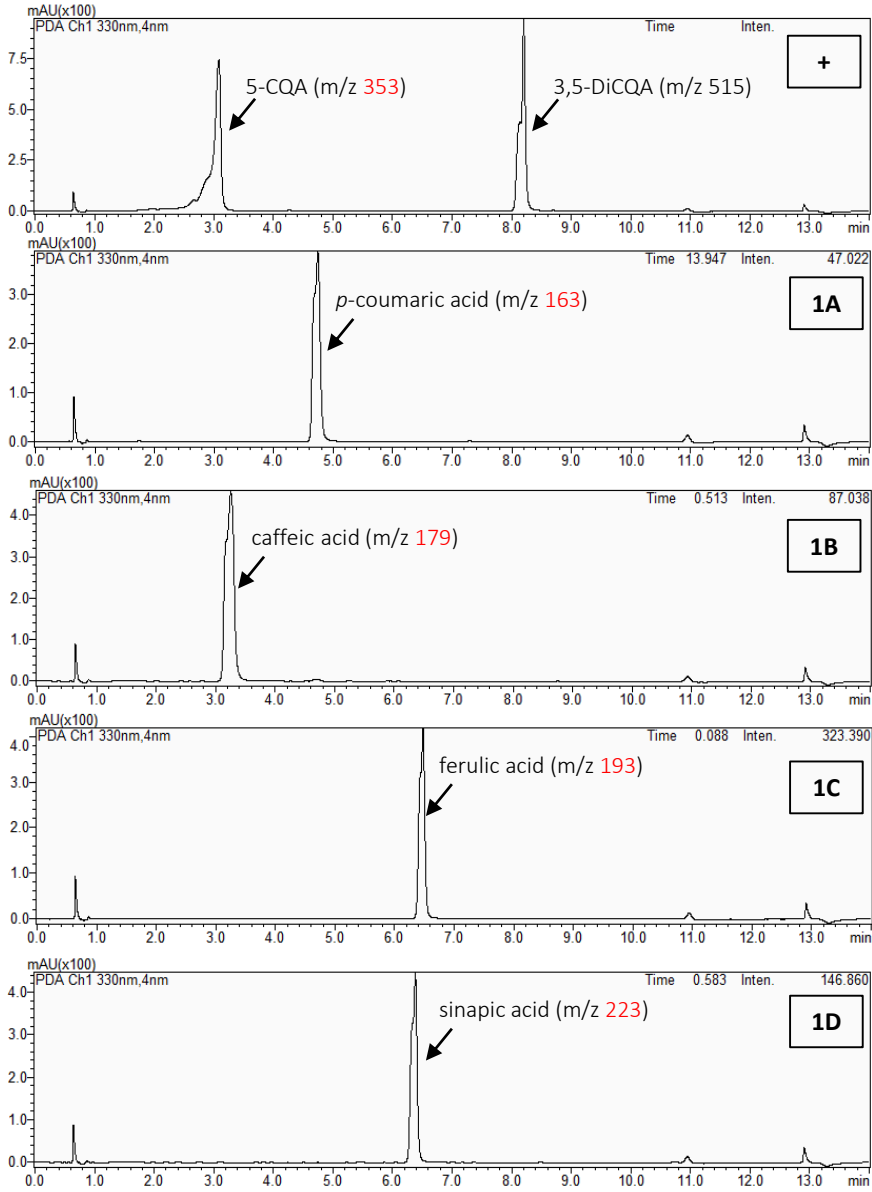

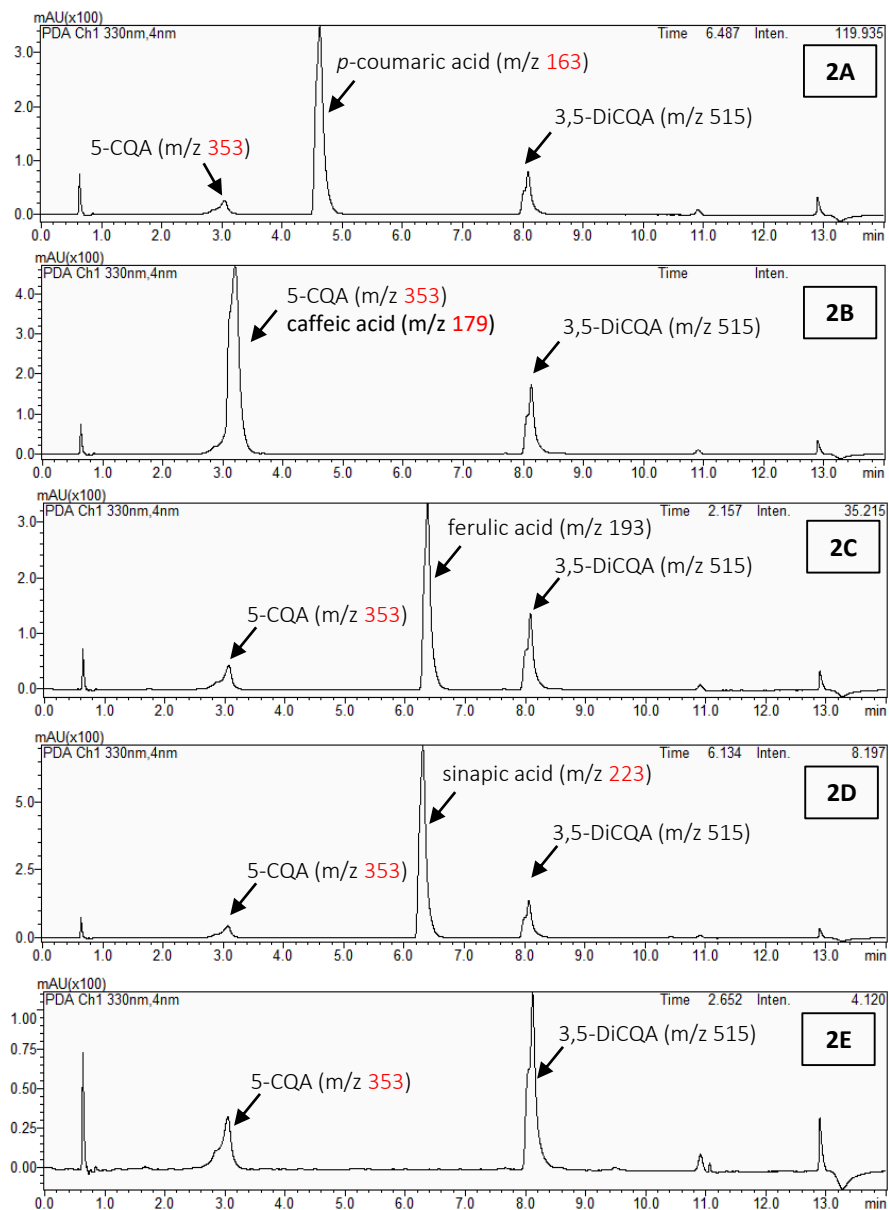

**Supplementary Figure 10:** Evaluation of IbICS activity with other hydroxycinnamate derivatives as acyl donors and quinic acid and 5-CQA as acyl acceptors.

Incubations were performed with 5 mM acyl donor *p*-coumaric acid (A), caffeic acid (B), ferulic acid (C) or sinapic acid (D), *trans*-cinnamic acid (E), and 5 mM acyl acceptor (quinic acid (1) and 5-CQA (2)) at 25°C overnight at pH 6. The activity of IbICS was confirmed in contact with 10 mM 5-CQA by the production of 3,5-diCQA and quinic acid (+).

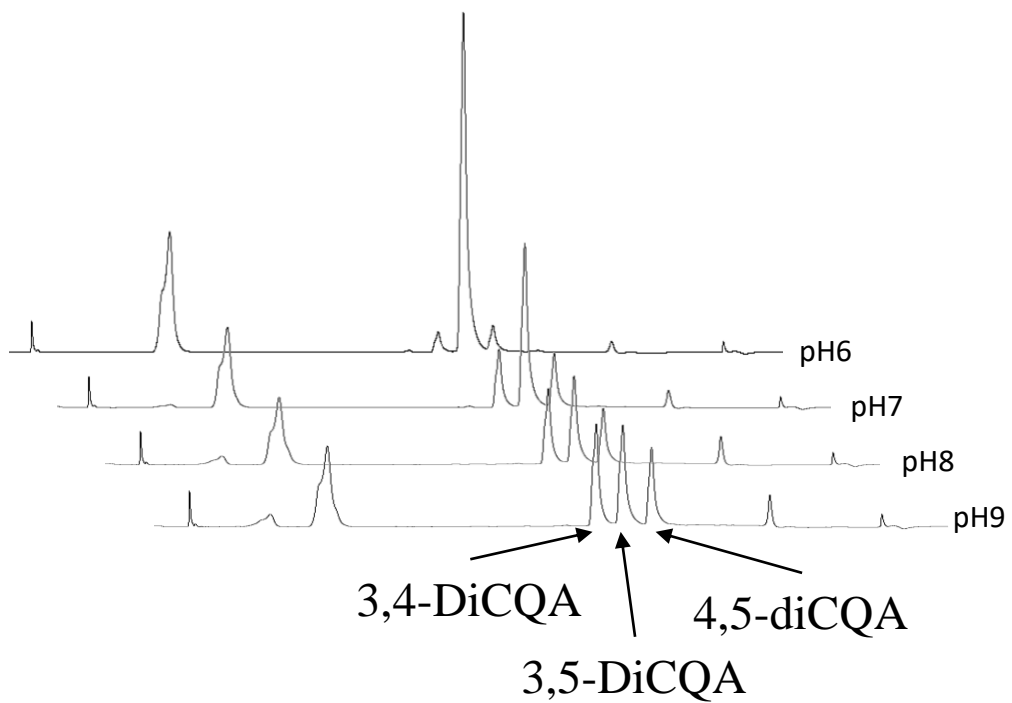

**Supplementary Figure 11:** Assessment of the stability of the chemical stability of 3,5-diCQA incubated during 15h at 30°C in buffers with different pH.

| Accession Nr   | Putative function                                             | Acrylamide slice ID | Peptide Sequences                                                                                                                                                                                                                                                                                                                                                                                                                                                                                                                                                                                                                                                                                                                                                                                                                                                                                                                                                                                                                                                                                                                         |
|----------------|---------------------------------------------------------------|---------------------|-------------------------------------------------------------------------------------------------------------------------------------------------------------------------------------------------------------------------------------------------------------------------------------------------------------------------------------------------------------------------------------------------------------------------------------------------------------------------------------------------------------------------------------------------------------------------------------------------------------------------------------------------------------------------------------------------------------------------------------------------------------------------------------------------------------------------------------------------------------------------------------------------------------------------------------------------------------------------------------------------------------------------------------------------------------------------------------------------------------------------------------------|
| XM_019330300.1 | Ipomoea nil 14-3-3 protein 1 (LOC109180616)                   | 5, 6                | AAQDIAAADLAPTHPIR, AAQDVAVADLAPTHPIR, AAQEVALADLSPHPIR, AFDEAISELDTLNEESYK, AFDEAISELDTLNEESYKDSTLIMQLLR, DNLTWTSDAQDQLDEP, DNLTWTSDMQDDGTDEIK, DNLTWTSDMQDDGTDEIKEAQNK, DNLTWTSDTADDAGDEIK, AYEATTTAEADLPPTHPIR, AAADGAEELTVEER, ACNLAKQAFDEAIAELDTLGEESYK, DSTLIMQLLRDNLTWTSDMQDDGDEIK, DSTLIMQLLRDNLTWTSDMQDDGTDEIK, DSTLIMQLLRDNLTWTSDMQDDGTDEIKEAQNK, EAADDTMNSYK, EQSVYMAKLAEQAERYEEMVK, GDYHRYLAEFKVGDER, GDYYRYLAEFKIGNER, GILNLLDSTLIDSASSSDSK, LGLALNFSVFYYEILNASEKACGMAKQAFEEAIAELDTLGEESYK, LGLALNFSVFYYEILNSPDR, LLDQYLIPASTSESK, LLESNLVPSASSSESK, LVLGSTPAEELTVEER, MAAALEGNLSREQVYVLAK, MAREENVYMAKLAEQAER, MWWDLGEHRGGSCHPLSK, QAFDEAIAELDTLGEESYK, QAFDEAIAELDTLGEESYKDSTLIMQLLR, QAFDEAIAELDTLGEESYKDSTLIMQLLRDNLTWTSDMQDDGDEIK, QAFDEAIAELDTLGEESYKDSTLIMQLLRDNLTWTSDMQDDGTDEIK, QAFDEAISELDTLGEESYK, QAFDEAISELDTLGEESYKDSTLIMQLLR, QAFDEAISELDTLGEESYKDSTLIMQLLRDNLTWTSDTADDAGDEIK, QAFEEAIAELDTLGEESYK, RAFDEAISELDTLNEESYK, SAQDIALGELAPTHPIR, SAQEIANAELAPTHPIR, SKIEAELTSICKGILNLLDSTLIDSASSSDSK, TVDVELTVEER, VETELTNICNDIMVLMDEHLIPSCTAGESNVFYKMK, VETELTNICNDIMVLMDEHLIPSCTAGESNVFYKMKGDYYR, VVAADGAEELTVEER |
| XM_019320443.1 | Ipomoea nil 14-3-3-like protein B (LOC109171366)              | 6                   | ACHLAKQAFDEAISELDNLNEESYK, AESELSPTHPIR, AESELSPTHPIRLGLALNFSVFYYEIMNSSEKACHLAK, AYQAATTKAESELSPTHPIRLGLALNFSVFYYEIMNSSEK, QAFDEAISELDNLNEESYKDSTLIMQLLR, QAFDEAISELDNLNEESYKDSTLIMQLLRDNLTWTSAPEDGEGGQK, YLAEFKAADERK                                                                                                                                                                                                                                                                                                                                                                                                                                                                                                                                                                                                                                                                                                                                                                                                                                                                                                                    |
| XM_019341199.1 | Ipomoea nil heat shock cognate protein 80-like (LOC109190650) | 4, 5, 6             | ADLVNNLGTIAR, ANNTLTIIDSGIGMTK, AQALRDSSMAGYMSSK, DEYAAFYKSLTNDWEEHLAVK, ELISNASDALDK, HNDDEQYVWESQAGGSFTVTR, HSEFISYPISLWIEK, HSEFISYPISLWTEK, ITLYLKEDQLEYLEER, KPEEITKDEYAAFYK, KTMEINPENPIMEELR, LDAQPELFIHIIPDK, LDAQPELFIHIVPDK, MAAETETFAFQAEINQLLSLIINTFYFYSNK, TMEINPENPIMEELR, TNNTLTIIDSGVGMTK, VVDSPCCLVTGEYGWANMER                                                                                                                                                                                                                                                                                                                                                                                                                                                                                                                                                                                                                                                                                                                                                                                                           |

| Accession Nr   | Putative function                                                                                      | Acrylamide slice ID | Peptide Sequences                                                                                                                                                                                                                                                                                                                                                                                                                                                                                                                                                                                                                                                                                                                                                                                       |
|----------------|--------------------------------------------------------------------------------------------------------|---------------------|---------------------------------------------------------------------------------------------------------------------------------------------------------------------------------------------------------------------------------------------------------------------------------------------------------------------------------------------------------------------------------------------------------------------------------------------------------------------------------------------------------------------------------------------------------------------------------------------------------------------------------------------------------------------------------------------------------------------------------------------------------------------------------------------------------|
| XM_019314302.  | <i>Ipomoea nil</i> phospholipase D alpha 1 (LOC109165505)                                              | 3, 4, 5, 6          | AGLVSGKDNIIDR, AYIPVEELLEGEVVDK, AYIPVEELLEGEVVDKWVEILDK, AYIPVEELLEGEVVDKWVEILDKDK, CWEDVFDAITNAK, DDNPVGATLIGR, DGLMATHDEETEQQFFKDTDVHCVLCPR, DSEIAMGAYQPYHLAGR, ELSEIIIPSPVMFDDQETWNVQLFR, FTVYIVPMWPEGIPESASVQAILDWQRR, GGPREPWHDIHSR, IPLSGGQYYEPHR,>IVVDHEMPSSGGSEQR, IVVDHEMPSSGGSEQR, KSGEYEPSETPEPDTDYMR, KVNDIADKYWDLYSSESLER, LEGPIAWDVLNFEQR, LLEPNPQWNESFHIYCAHSASNVIFTVK, MAQFLLHGLTHVTIYIDQLQEGGGGGGGFFRKIMEHVEEAVHIGK, MMIVDDEYIIVGSANINQR, NPDDGGSFVQDLQISTMFTHHQK, PLSGGQYYEPHR, RPKPGGDITLGELLK, SGEYEPSETPEPDTDYMR, SIDGGAAFGFPDTPEGAAG, TLDTAHHDDFHQPNFPDASITK, TSVGLLKKDGLMATHDEETEQQFFK, TYLTFFCVGNR, VCMLVWDDR, VEDIGALHLVAK, VGRTRLLEPNPQWNESFHIYCAHSASNVIFTVK, VNDIADKYWDLYSSESLER, VSLYQDAHIPDGFVPR, WVEILDKDKNPINEGSK, YPGVPYTFGGQR, YPIGISSDGDVTELPGEFFPDTK, YWDLYSSESLER) |
| XM_019313071.1 | <i>Ipomoea nil</i> GDSL esterase/lipase At1g28590-like (LOC109164567)                                  | 3, 4, 5             | AIAQAVHELVELGAR, ELLDGSFLVLGEFGGNDYTHSLLSGK, GINVIRPFIPIVTR, LEPDGTVPHPMYFPPYGETYFDKPTGR, LIVDLIAQHYGLPLPPSPASLEGDK, NVIRPFIPIVTR                                                                                                                                                                                                                                                                                                                                                                                                                                                                                                                                                                                                                                                                       |
| XM_019310914.1 | <i>Ipomoea nil</i> proteasome subunit alpha type-7 (LOC109162181)                                      | 6                   | AITVFSPDGHLFQVEYALEAVR, EFLEKNYKETSQQETVK, IVNLDDHIALACAGLK, KYTQSGGVRPFGSLTLIIGFDPYTGVPSTYQTDPSGTFSAWKANATGR, NYKETSQQETVKLAIR, QLEEAIDAIVAEIEAEK, YTQSGGVRPFGSLTLIIGFDPYTGVPSTYQTDPSGTFSAWK                                                                                                                                                                                                                                                                                                                                                                                                                                                                                                                                                                                                           |
| XM_019321217.1 | <i>Ipomoea nil</i> mitogen-activated protein kinase homolog NTF4 (LOC109172058), transcript variant X1 | 3                   | ASFNDVYIAYELMDTDLHQIIR, FIQYNIFGNVFEVTAK                                                                                                                                                                                                                                                                                                                                                                                                                                                                                                                                                                                                                                                                                                                                                                |
| XM_019331679.1 | <i>Ipomoea nil</i> pyruvate decarboxylase 1 (LOC109181768)                                             | 3, 4, 5, 6          | AVKPVIIIGGPK, LSNQMGLEAAVEAAAEFLNK, VGRTRLLEPNPQWNESFHIYCAHSASNVIFTVK, VISCIGDGSFQVTAQDVSTMLR, AYEAAATASTDLPPTHPIR, DNLTLTWTSDLPEEGGEQSK, QAFDEAIAELDSLNEESYK, QAFDEAIAELDSLNEESYKDSTLIMQLLRDNLTLTWTSDLPEEGGEQSK                                                                                                                                                                                                                                                                                                                                                                                                                                                                                                                                                                                        |
| XM_019303178.1 | <i>Ipomoea nil</i> 14-3-3 protein 9-like (LOC109155578)                                                | 5, 6                | AYETATTTAEELPPTHPIR, AYETATTTAEELPPTHPIRLGLALNFSVFYIEIMNSPER, DNLTLTWADIPEDAEDGQK, IAEQAERYDEMVDAMKK, LGALNFSVFYIEIINSPERACHLAK, QAFDEAIAELDSLNEESYK, QAFDEAIAELDSLNEESYKDSTLIMQLLRDNLTLTWADIPEDAEDGQK)                                                                                                                                                                                                                                                                                                                                                                                                                                                                                                                                                                                                 |
| AF109123.1     | <i>Ipomoea batatas</i> anionic peroxidase Swpa3 (swpa3)                                                | 3, 5                | CPLLCPVIFINPAR, EVVDAIDAETR, FTGETYVTTLGR, GFTETELVALLGVHTVGFGR, YRDEMDFLADFAAAMVK                                                                                                                                                                                                                                                                                                                                                                                                                                                                                                                                                                                                                                                                                                                      |
| M64362.1       | Sweet potato starch phosphorylase                                                                      | 3, 4, 5             | DELEEKDTELEK, DFPSYIECQEK, FADNEDLQIEWR, FAMNGCILIGTLDGANVEIRQEVGEEFFLFGAEAHEIAGLR, FITDVGATINHDEIGDLLK, KFADNEDLQIEWR, MANLCVVGGHAVNGVAEIHSDIVK, QEVGEEFFLFGAEAHEIAGLR, TANLTGANTQLVGPNEELASQVEK, TGYSVSPNAMFDIQVK, WIGTEDWVLNTEK                                                                                                                                                                                                                                                                                                                                                                                                                                                                                                                                                                      |

| Accession Nr   | Putative function                                                           | Acrylamide slice ID | Peptide Sequences                                                                                                                                                                                              |
|----------------|-----------------------------------------------------------------------------|---------------------|----------------------------------------------------------------------------------------------------------------------------------------------------------------------------------------------------------------|
| AF259983.1     | Ipomoea batatas putative cysteine protease                                  | 3, 4                | DFQLYSSGIFTGSCGTDLDHGVTAVGYGTENGVDYWIVK, EAVAGQPVSVAIEAGGR, NGGIDTEADYPYTG, NSWAASWGEK, VVSIDGYEDVTPYDEAALK                                                                                                    |
| XM_019344884.1 | Ipomoea nil luminal-binding protein 4 (LOC109194034)                        | 3, 6                | DILLLDVAPLTLGIETVGGVMTK, EPNKGVNPDEAVAFGAAVQGGILSGEGGDETK,FDLTGIAPAPR, ITPSWVGFDTNER, KSQVFTTYQDQQTTVTIQVFEGE, SQVFTTYQDQQTTVTIQVFEGE)                                                                         |
| XM_019319061.1 | Ipomoea nil annexin D1 (LOC109170102)                                       | 4                   | DLEADEKDEFLAILR, DTHGDYEDMLLALLGHGDI, QAYADTYGEDILK, SLEEDVAQHTTGDFR, SLEEDVAQHTTGDFRK                                                                                                                         |
| XM_019343001.1 | Ipomoea nil heat shock protein 90-6, mitochondrial (LOC109192387)           | 4                   | DLEVLFLVDPIDEVAIQNLK, EIYYIASDSVASAK                                                                                                                                                                           |
| XM_019297162.1 | Ipomoea nil low-temperature-induced cysteine proteinase-like (LOC109149412) | 3, 4, 5             | DQGSCGSCWAFSTIAAVEGVNQLATGNLISLSEQELVDCDRK, FADITNEEYRTGYLGSKR, INQGCNGGDMDYAFQFIK, NGGIDSEEDYPYTGKDGK, NSWGDYWGGEK, SGLCGIAMEASYPTKTGDNPPSPSPSPPTPAPPSPSAPSVCDK, VASIDGYEDVPIINNEK                            |
| XM_019297245.1 | Ipomoea nil fructose-bisphosphate aldolase 6, cytosolic (LOC109149463)      | 5                   | ELLFTTPGALK, YLSGVILFEETLYQK                                                                                                                                                                                   |
| XM_019316225.1 | Ipomoea nil aspartic proteinase-like (LOC109167232)                         | 4, 5                | FTVIFDTGSSNLWVPSK, NYLDAQYYGEISIGSPQK                                                                                                                                                                          |
| XM_019311849.1 | Ipomoea nil ribonuclease TUDOR 1-like (LOC109163119), transcript variant X2 | 5                   | GAVQSPSTDEFVFIYDYGNEQEAVPYSK, IWANYVEGEEVPTGPVSERRQK, KGDIVLAQFSADNSWNR                                                                                                                                        |
| XM_019331998.1 | Ipomoea nil ferritin-3, chloroplastic-like (LOC109182001)                   | 5                   | GDALYAMELALSLEK                                                                                                                                                                                                |
| XM_019305920.1 | Ipomoea nil proteasome subunit alpha type-6-like (LOC109158098)             | 6                   | NDPAFSYEETVQTAISALQSVLQEDFK, NDPAFSYEETVQTAISALQSVLQEDFKASEIEVGVVRQEDPSFR, QEDPSFRVLSTEEIDEHLTAISER, SQVYQTHAYMRPLGVVAMVLGIDDEK, SQVYQTHAYMRPLGVVAMVLGIDEK, VLSTEEIDEHLTAISER, VLSTEEIDEHLTAISERD, YGYEMPVDVLR |
| XM_019298071.1 | Ipomoea nil 2-Cys peroxiredoxin BAS1, chloroplastic (LOC109150163)          | 3                   | SYNVLIPDQGIALR, SYNVLIPDQGIALRGLFIIDK                                                                                                                                                                          |
| XM_019339350.1 | Ipomoea nil isovaleryl-CoA dehydrogenase, mitochondrial (LOC109188731)      | 3                   | VADMYTALQSSR                                                                                                                                                                                                   |
| XM_019321471.1 | Ipomoea nil luminal-binding protein 4-like (LOC109172297)                   | 3, 6                | VEIANDQGNR, VQQLLKDYFDGK                                                                                                                                                                                       |

**Supplementary table 1:** List of the different peptides obtained by LC MS/MS analysis and the corresponding proteins identified in public databases.
