# Supplementary material for: A GDSL lipase-like from Ipomoea batatas catalyzes efficient production of 3,5-diCQA when expressed in Pichia pastoris
Source: PubMed Central journal article supplement (PMC7666189; doi:10.1038/s42003-020-01387-1), 2020-11-13
Supplement: 42003_2020_1387_MOESM4_ESM.pdf [file 42003_2020_1387_MOESM4_ESM.pdf]

Incubation :30min à 6°C à 42°C

Echantillons: GDSL purifiée avec un dosage de 0,410mg/ml (Bradford+qBit) - pureté de 5%

Extraction: Protéine dessalée et éluée dans PBSx1 ph 7.4

Incubation avec CGA à la concentration finale de 10mM

Utilisation d'un polytampon (0.1MTris, 20mM MES, 0.1M acide acétique) à ph6.5

Solution mère CGA 100mM dans Tampon PBSx1 + 1g/L MES, pH3

Réaction: 2µl échantillon protéique +5µl CGA 100mM + 43µl Tp ph6.5

Arrêt de la réaction avec 150µl d'EtOH absolu pour 50µl de réaction

Vortex pendant 30 secondes après incubation, centrifugation 10 minutes Vit max

**Date manip n°1: 20190115**

| Data Filename  | Ret. Time | Area   | Teneur en 3,5-DCQ (mg/L) | Prise en compte de la dilution par 4 | Moyenne (mg/L) | ET (mg/L) | Teneur en 3,5-DCQ (mM) | Moyenne (mmol/L) | ET (mM)     | Bioconversion (%) | Moyenne (%) | ET(%)       |
|----------------|-----------|--------|--------------------------|--------------------------------------|----------------|-----------|------------------------|------------------|-------------|-------------------|-------------|-------------|
| GDSL_6°C_n°3.1 | -----     | 0      | 0                        | 0                                    |                |           | 0                      |                  |             | 0                 |             |             |
| GDSL_6°C_n°2.1 | -----     | 0      | 0                        | 0                                    |                |           | 0                      |                  |             | 0                 |             |             |
| GDSL_6°C_n°1.1 | -----     | 0      | 0                        | 0                                    | 0              | 0         | 0                      | 0                | 0           | 0                 | 0           | 0           |
| GDSL_16°C_n°3  | 8.203     | 222672 | 14,117746                | 56,470982                            |                |           | 0,3666947              |                  |             | 5,092981788       |             |             |
| GDSL_16°C_n°2  | 8.190     | 301410 | 19,109855                | 76,439421                            |                |           | 0,4963599              |                  |             | 6,893887156       |             |             |
| GDSL_16°C_n°1  | 8.192     | 321986 | 20,414405                | 81,65762                             | 71,52267       | 10,034462 | 0,5302443              | 0,4484695        | 0,065158841 | 7,364503998       | 6,450457647 | 0,904983906 |
| GDSL_18°C_n°3  | 8.197     | 321656 | 20,393483                | 81,57393                             |                |           | 0,5297008              |                  |             | 7,356956196       |             |             |
| GDSL_18°C_n°2  | 8.205     | 360703 | 22,869122                | 91,476488                            |                |           | 0,5940032              |                  |             | 8,250044056       |             |             |
| GDSL_18°C_n°1  | 8.196     | 359273 | 22,778458                | 91,113832                            | 88,05475       | 4,3205466 | 0,5916483              | 0,5606746        | 0,028055497 | 8,217336917       | 7,941445723 | 0,389659685 |
| GDSL_20°C_n°3  | 8.227     | 406090 | 25,746727                | 102,98691                            |                |           | 0,6687462              |                  |             | 9,288141187       |             |             |
| GDSL_20°C_n°2  | 8.212     | 403128 | 25,558932                | 102,23573                            |                |           | 0,6638684              |                  |             | 9,220393954       |             |             |
| GDSL_20°C_n°1  | 8.208     | 410855 | 26,048836                | 104,19534                            | 103,1393       | 0,7040106 | 0,6765931              | 0,6726696        | 0,004571497 | 9,397126862       | 9,301887334 | 0,063493019 |
| GDSL_22°C_n°3  | 8.228     | 492014 | 31,19444                 | 124,77776                            |                |           | 0,8102452              |                  |             | 11,25340564       |             |             |
| GDSL_22°C_n°2  | 8.218     | 456864 | 28,965877                | 115,86351                            |                |           | 0,7523604              |                  |             | 10,44945046       |             |             |
| GDSL_22°C_n°1  | 8.216     | 0      | 0                        | 0                                    | 120,3206       | 4,4571276 | 0                      | 0,7813028        | 0,028942387 | 0                 | 10,85142805 | 0,401977595 |
| GDSL_25°C_n°3  | 8.208     | 592853 | 37,587787                | 150,35115                            |                |           | 0,9763062              |                  |             | 13,55980784       |             |             |
| GDSL_25°C_n°2  | 8.218     | 596225 | 37,801577                | 151,20631                            |                |           | 0,9818592              |                  |             | 13,63693265       |             |             |
| GDSL_25°C_n°1  | 8.211     | 488993 | 31,002904                | 124,01162                            | 141,8564       | 11,896494 | 0,8052702              | 0,8907882        | 0,077249961 | 11,18430896       | 12,79368315 | 1,072916129 |

|               |       |        |           |           |          |           |           |           |             |             |             |             |
|---------------|-------|--------|-----------|-----------|----------|-----------|-----------|-----------|-------------|-------------|-------------|-------------|
| GDSL_28°C_n°3 | 8.212 | 726927 | 46,088284 | 184,35314 |          |           | 1,1970983 |           |             | 16,62636511 |             |             |
| GDSL_28°C_n°2 | 8.224 | 600913 | 38,098804 | 152,39521 |          |           | 0,9895793 |           |             | 13,74415717 |             |             |
| GDSL_28°C_n°1 | 8.201 | 539354 | 34,195869 | 136,78348 | 157,8439 | 17,672796 | 0,8882044 | 1,0426513 | 0,114758416 | 12,33617204 | 14,23556477 | 1,593866894 |
| GDSL_30°C_n°3 | 8.223 | 748651 | 47,465619 | 189,86248 |          |           | 1,2328732 |           |             | 17,12323915 |             |             |
| GDSL_30°C_n°2 | 8.206 | 643763 | 40,815559 | 163,26224 |          |           | 1,0601444 |           |             | 14,72422772 |             |             |
| GDSL_30°C_n°1 | 8.223 | 731046 | 46,349435 | 185,39774 | 179,5075 | 10,830165 | 1,2038814 | 1,2183773 | 0,070325746 | 16,7205754  | 16,18934742 | 0,976746468 |
| GDSL_32°C_n°3 | 8.189 | 830843 | 52,676717 | 210,70687 |          |           | 1,3682264 |           |             | 19,00314484 |             |             |
| GDSL_32°C_n°2 | 8.206 | 967370 | 61,332738 | 245,33095 |          |           | 1,5930581 |           |             | 22,12580743 |             |             |
| GDSL_32°C_n°1 | 8.207 | 940361 | 59,620326 | 238,48131 | 231,5064 | 13,866337 | 1,5485799 | 1,4584032 | 0,090041151 | 21,50805421 | 20,87900216 | 1,250571547 |

### 25°C

|                 |       |         |           |           |  |  |           |  |  |             |  |  |
|-----------------|-------|---------|-----------|-----------|--|--|-----------|--|--|-------------|--|--|
| GDSL_lot2_2µl.  | 0     | 0       | 0         | 0         |  |  | 0         |  |  | 0           |  |  |
| GDSL_lot2_5µl.  | 8.210 | 479754  | 30,417138 | 121,66855 |  |  | 0,7900555 |  |  | 10,97299339 |  |  |
| GDSL_lot2_7.5µl | 8.209 | 1078528 | 68,380325 | 273,5213  |  |  | 1,7761124 |  |  | 24,66822709 |  |  |
| GDSL_lot2_10µ   | 8.224 | 1323463 | 83,909579 | 335,63832 |  |  | 2,1794696 |  |  | 30,27041099 |  |  |
| GDSL_lot2_20µ   | 8.208 | 2818852 | 178,71953 | 714,87812 |  |  | 4,6420657 |  |  | 64,47313493 |  |  |

35DCQ\_100mgL\_1.lcd 0 8.183 1577249

### Date manip n°2: 20190117

| Data Filename | Ret. Time | Area   | Teneur en 3,5-DCQ (mg/L) | Prise en compte de la dilution par 4 | Moyenne (mg/L) | ET (mg/L) | Teneur en 3,5-DCQ (mM) | Moyenne (mmol/L) | ET (mM)     | Bioconversion (%) | Moyenne (%) | ET(%)       |
|---------------|-----------|--------|--------------------------|--------------------------------------|----------------|-----------|------------------------|------------------|-------------|-------------------|-------------|-------------|
| GDSL_28°C_n°1 | 8.307     | 703261 | 45,647195                | 182,58878                            |                |           | 1,1856414              |                  |             | 16,46724208       |             |             |
| GDSL_28°C_n°2 | 8.271     | 699690 | 45,415409                | 181,66164                            |                |           | 1,179621               |                  |             | 16,38362516       |             |             |
| GDSL_28°C_n°3 | 8.297     | 536714 | 34,836979                | 139,34792                            | 167,8661       | 19,01213  | 0,9048566              | 1,0900397        | 0,123455389 | 12,56745272       | 15,13943999 | 1,714658178 |
| GDSL_30°C_n°1 | 8.264     | 810666 | 52,618628                | 210,47451                            |                |           | 1,3667176              |                  |             | 18,98218907       |             |             |
| GDSL_30°C_n°2 | 8.261     | 804704 | 52,231647                | 208,92659                            |                |           | 1,3566662              |                  |             | 18,84258557       |             |             |
| GDSL_30°C_n°3 | 8.266     | 814978 | 52,898511                | 211,59404                            | 210,3317       | 0,9367508 | 1,3739873              | 1,3657904        | 0,006082798 | 19,08315692       | 18,96931052 | 0,084483299 |
| GDSL_32°C_n°1 | 8.253     | 895454 | 58,122039                | 232,48816                            |                |           | 1,5096634              |                  |             | 20,9675466        |             |             |



|      |           |           |           |           |          |           |           |           |             |             |             |             |
|------|-----------|-----------|-----------|-----------|----------|-----------|-----------|-----------|-------------|-------------|-------------|-------------|
| 6°C  | 0         |           | 0         | 0         |          | 0         | 0         |           | 0           | 0           |             | 0           |
| 16°C | 0,4484695 |           | 0,4484695 | 0,0651588 |          | 0,0651588 | 6,4504576 |           | 6,450457647 | 0,904983906 |             | 0,904983906 |
| 18°C | 0,5606746 |           | 0,5606746 | 0,0280555 |          | 0,0280555 | 7,9414457 |           | 7,941445723 | 0,389659685 |             | 0,389659685 |
| 20°C | 0,6726696 |           | 0,6726696 | 0,0045715 |          | 0,0045715 | 9,3018873 |           | 9,301887334 | 0,063493019 |             | 0,063493019 |
| 22°C | 0,7813028 |           | 0,7813028 | 0,0289424 |          | 0,0289424 | 10,851428 |           | 10,85142805 | 0,401977595 |             | 0,401977595 |
| 25°C | 0,8907882 |           | 0,8907882 | 0,07725   |          | 0,07725   | 12,793683 |           | 12,79368315 | 1,072916129 |             | 1,072916129 |
| 28°C | 1,0426513 | 1,0900397 | 1,0663455 | 0,1147584 | 0,123455 | 0,1191069 | 14,235565 | 15,13944  | 14,68750238 | 1,593866894 | 1,714658178 | 1,654262536 |
| 30°C | 1,2183773 | 1,3657904 | 1,2920838 | 0,0703257 | 0,006083 | 0,0382043 | 16,189347 | 18,969311 | 17,57932897 | 0,976746468 | 0,084483299 | 0,530614884 |
| 32°C | 1,4584032 | 1,4765289 | 1,467466  | 0,0900412 | 0,027461 | 0,0587509 | 20,879002 | 20,507345 | 20,69317369 | 1,250571547 | 0,381397658 | 0,815984603 |
| 34°C |           | 1,6134205 | 1,6134205 |           | 0,125142 | 0,1251421 |           | 22,408618 | 22,40861751 |             | 1,738084134 | 1,738084134 |
| 36°C |           | 1,6527355 | 1,6527355 |           | 0,061236 | 0,061236  |           | 22,95466  | 22,9546603  |             | 0,850499554 | 0,850499554 |
| 38°C |           | 1,7083034 | 1,7083034 |           | 0,149208 | 0,1492084 |           | 23,726437 | 23,72643678 |             | 2,072338487 | 2,072338487 |
| 40°C |           | 1,6785886 | 1,6785886 |           | 0,016487 | 0,0164868 |           | 23,31373  | 23,31372993 |             | 0,228983251 | 0,228983251 |
| 42°C |           | 1,5907274 | 1,5907274 |           | 0,177664 | 0,1776644 |           | 22,093436 | 22,09343642 |             | 2,467561726 | 2,467561726 |
